# Supplementary material for: Probing the O⋯Br–Br halogen bonding in X-ray crystal structures with ab initio calculations
Source: Royal Society of Chemistry journal article supplement (doi:10.1039/c2ce06283f), 2012-01-01
Supplement: c2ce06283f.pdf [file c2ce06283f.pdf]

**Electronic Supplementary Information**

Probing the O...Br-Br halogen bonding in the x-ray  
crystal structures with *ab initio* calculations

Rabindranath Lo,<sup>a</sup> Amar Ballabh,<sup>b</sup> Ajeet Singh,<sup>a</sup> Parthasarathi Dastidar\*<sup>c</sup> and Bishwajit Ganguly\*<sup>a</sup>

<sup>a</sup>Analytical Science Discipline, Central Salt & Marine Chemicals Research Institute (Council of Scientific and Industrial Research), Bhavnagar, Gujarat, India-364 002.

<sup>b</sup> Analytical Science Discipline, Central Salt & Marine Chemicals Research Institute (Council of Scientific and Industrial Research), Bhavnagar, Gujarat, India-364 002 (Currently in Department of Chemistry, M.S. University, Vadodara, Gujarat, India-390 002).

<sup>c</sup> Analytical Science Discipline, Central Salt & Marine Chemicals Research Institute (Council of Scientific and Industrial Research), Bhavnagar, Gujarat, India-364 002 (Currently in Department of Organic Chemistry, Indian Association for the Cultivation of Science, Kolkata, West Bengal, India-700 032).

E-mail: [ganguly@csmcri.org](mailto:ganguly@csmcri.org)

| S. No. | Entry name                                                                                                                                                    | Page No. |
|--------|---------------------------------------------------------------------------------------------------------------------------------------------------------------|----------|
| 1      | Cartesian coordinates for <b>1-6</b> at MP2/6-311+G* level of theory.                                                                                         | S2       |
| 2      | Cartesian coordinates for <b>1-6</b> at CBS-QB3 level of theory.                                                                                              | S4       |
| 3      | <b>Fig. S1</b> MP2/6-311+G* optimized geometries of $\sigma$ -type interaction for methanol, dimethyl ether, acetone and formaldehyde with bromine molecules. | S6       |
| 4      | <b>Fig. S2</b> Different geometries of methanol, 1,3-dioxane, acetone and formaldehyde with bromine molecule taken from x-ray crystal structure.              | S7       |
| 5      | <b>Fig. S3</b> The maximum electrostatic potentials ( $V_{S,max}$ ) of bromine atom for 1,4-dioxane:Br <sub>2</sub> and acetone:Br <sub>2</sub> complexes.    | S7       |
| 6      | <b>Fig. S4</b> MP2/6-311+G* optimized bridging geometry of acetone with bromine molecule.                                                                     | S8       |
| 7      | <b>Fig. S5</b> CBS-QB3 optimized geometries of $\sigma$ -type interaction for methanol, dimethyl ether and formaldehyde with bromine molecule.                | S8       |

**Cartesian coordinates for 1-6 at MP2/6-311+G\* level of theory.**

|          |    |             |             |             |  |  |  |
|----------|----|-------------|-------------|-------------|--|--|--|
| <b>1</b> | O  | 2.64395300  | -0.00009000 | -0.34031800 |  |  |  |
|          | C  | 3.21356800  | -1.17077200 | 0.22417000  |  |  |  |
| C        |    | 3.65471100  | 0.73330900  | 0.02185200  |  |  |  |
| O        |    | 2.94497600  | -0.50397700 | -0.05783800 |  |  |  |
| H        |    | 4.71520600  | 0.59534500  | -0.20551400 |  |  |  |
| H        |    | 3.21354700  | 1.38654800  | -0.72781300 |  |  |  |
| H        |    | 3.54571200  | 1.19637500  | 1.00670500  |  |  |  |
| H        |    | 3.30882900  | -1.12521000 | 0.58044700  |  |  |  |
| Br       |    | 0.28864700  | -0.20945800 | -0.02418900 |  |  |  |
| Br       |    | -2.01068600 | 0.14028300  | 0.01498200  |  |  |  |
| <b>2</b> |    |             |             |             |  |  |  |
|          | O  | 2.64395300  | -0.00009000 | -0.34031800 |  |  |  |
|          | C  | 3.21356800  | -1.17077200 | 0.22417000  |  |  |  |
|          | H  | 3.03110800  | -1.21322100 | 1.30499800  |  |  |  |
|          | H  | 2.73728000  | -2.02304000 | -0.25831300 |  |  |  |
|          | H  | 4.29345900  | -1.20149200 | 0.03771700  |  |  |  |
|          | C  | 3.20451400  | 1.17612400  | 0.22178900  |  |  |  |
|          | H  | 3.02303900  | 1.21863100  | 1.30279600  |  |  |  |
|          | H  | 4.28386000  | 1.21557400  | 0.03394500  |  |  |  |
|          | H  | 2.72023900  | 2.02362100  | -0.26114100 |  |  |  |
|          | Br | 0.01868400  | -0.00219700 | -0.16071200 |  |  |  |
|          | Br | -2.29723000 | 0.00072700  | 0.10033400  |  |  |  |

**3eq**

|    |             |             |             |
|----|-------------|-------------|-------------|
| O  | -4.34336400 | 0.00080100  | 0.52443900  |
| C  | -3.76985000 | 1.16196000  | -0.06282300 |
| C  | -2.26491700 | 1.17023900  | 0.12636900  |
| O  | -1.68914200 | -0.00057200 | -0.46078700 |
| C  | -2.26596800 | -1.17067300 | 0.12675800  |
| C  | -3.77089800 | -1.16106000 | -0.06245100 |
| H  | -4.00915600 | 1.19470800  | -1.13604600 |
| H  | -4.22829700 | 2.02221500  | 0.43104000  |
| H  | -2.01763700 | 1.19949500  | 1.19699400  |
| H  | -1.80392000 | 2.02547200  | -0.37336100 |
| H  | -2.01871600 | -1.19980400 | 1.19739200  |
| H  | -1.80576900 | -2.02648900 | -0.37270900 |
| H  | -4.01021200 | -1.19392500 | -1.13566800 |
| H  | -4.23014400 | -2.02074200 | 0.43167000  |
| Br | 0.91546400  | -0.00042900 | -0.19213900 |
| Br | 3.22207000  | 0.00027000  | 0.14883500  |

**3ax**

|   |             |             |             |
|---|-------------|-------------|-------------|
| O | -3.61015100 | 0.02558900  | 1.12344000  |
| C | -2.86515600 | -1.14423700 | 0.80526500  |
| C | -2.54399200 | -1.18554000 | -0.67700500 |
| O | -1.80743400 | -0.02261200 | -1.06423100 |
| C | -2.54015600 | 1.15766500  | -0.72541900 |
| C | -2.86168600 | 1.17900800  | 0.75720100  |
| H | -1.93486300 | -1.16572300 | 1.39113100  |
| H | -3.48476100 | -1.99752100 | 1.09210800  |
| H | -3.47194700 | -1.23295000 | -1.26371800 |
| H | -1.91713800 | -2.04530000 | -0.92593900 |
| H | -3.46812200 | 1.18350100  | -1.31351000 |
| H | -1.91128700 | 2.00485100  | -1.00999500 |
| H | -1.93179600 | 1.22254200  | 1.34253400  |

|    |             |             |             |
|----|-------------|-------------|-------------|
| H  | -3.47909900 | 2.04524100  | 1.00772400  |
| Br | 0.73651500  | -0.00978800 | -0.35367700 |
| Br | 2.97221700  | 0.00750700  | 0.30355600  |

**4eq**

|    |             |             |             |
|----|-------------|-------------|-------------|
| C  | 2.31430000  | -1.14559600 | 0.09624200  |
| O  | 1.72316300  | 0.00864400  | -0.47209400 |
| C  | 2.28070700  | 1.18955400  | 0.11788700  |
| C  | 3.79057900  | 1.19323700  | -0.07515800 |
| H  | 2.11933100  | -1.14675500 | 1.18302100  |
| H  | 1.85318300  | -2.00516500 | -0.38618000 |
| H  | 2.02072800  | 1.21180100  | 1.18749200  |
| H  | 1.79501900  | 2.03271800  | -0.37537400 |
| H  | 4.01726700  | 1.27237600  | -1.14216300 |
| H  | 4.23918300  | 2.05120100  | 0.43878800  |
| Br | -0.92722600 | -0.00789300 | -0.19558400 |
| Br | -3.22858100 | 0.00605000  | 0.15588400  |
| C  | 4.35752000  | -0.11356100 | 0.46411300  |
| H  | 4.23266100  | -0.16917700 | 1.55695500  |
| H  | 5.41612400  | -0.23335100 | 0.22998500  |
| O  | 3.68947800  | -1.22001500 | -0.14309800 |

**4ax**

|   |             |             |             |
|---|-------------|-------------|-------------|
| C | -2.58454500 | -1.32150500 | -0.02803800 |
| O | -1.84876200 | -0.53506000 | -0.94414300 |
| C | -2.52994000 | 0.69953700  | -1.20059200 |
| C | -2.77179100 | 1.44216800  | 0.10667200  |
| H | -3.57346000 | -1.54027300 | -0.46710700 |
| H | -2.01532500 | -2.23565500 | 0.13004300  |
| H | -3.48058100 | 0.47776700  | -1.70877700 |
| H | -1.89195500 | 1.25958900  | -1.88593000 |
| H | -1.81372500 | 1.75187100  | 0.53319300  |
| H | -3.37414900 | 2.34049900  | -0.07172600 |

|          |             |             |             |          |             |             |             |
|----------|-------------|-------------|-------------|----------|-------------|-------------|-------------|
| Br       | 0.72523300  | -0.19037900 | -0.28897100 | H        | -1.98237100 | 1.74584500  | -0.31459700 |
| Br       | 2.96276400  | 0.15289200  | 0.25243400  | H        | -5.21277000 | 0.08514100  | 0.84313200  |
| C        | -3.47875900 | 0.50835400  | 1.08076500  | H        | -5.16456500 | -0.22462700 | -0.88870200 |
| H        | -4.49562600 | 0.27486200  | 0.72710000  | H        | -4.69917700 | -1.52138800 | 0.24091000  |
| H        | -3.54986600 | 0.93361400  | 2.08271600  | Br       | 0.39761100  | -0.27422900 | -0.02029400 |
| O        | -2.73811300 | -0.70513600 | 1.21744900  | Br       | 2.68257000  | 0.14915300  | 0.01793600  |
| <b>5</b> |             |             |             | <b>6</b> |             |             |             |
| C        | -3.23192100 | 0.02331900  | -0.00528100 | C        | 2.63509300  | 2.71119700  | 0.00000000  |
| O        | -2.30353400 | -0.77430300 | -0.03622100 | O        | 1.42614700  | 2.84850600  | 0.00000000  |
| C        | -3.00625000 | 1.51751800  | -0.02130900 | Br       | 0.00000000  | 0.42157600  | 0.00000000  |
| C        | -4.66575000 | -0.44764400 | 0.06019200  | Br       | -0.96091500 | -1.68872200 | 0.00000000  |
| H        | -3.71167900 | 2.01254100  | -0.69369700 | H        | 3.10258300  | 1.71247500  | 0.00000000  |
| H        | -3.18398000 | 1.91542300  | 0.98363400  | H        | 3.30971000  | 3.58238400  | 0.00000000  |

**Cartesian coordinates for 1-6 at CBS-QB3 level of theory.**

|          |             |             |             |                       |             |             |             |
|----------|-------------|-------------|-------------|-----------------------|-------------|-------------|-------------|
| <b>1</b> |             |             |             | H                     | -2.69971700 | 2.02760700  | -0.27277900 |
| C        | 3.64319100  | 0.69876000  | 0.02860800  | Br                    | -0.05026600 | -0.00028300 | -0.13854700 |
| O        | 2.89656300  | -0.52235000 | -0.03275200 | Br                    | 2.32012600  | 0.00010600  | 0.08618000  |
| H        | 4.71456900  | 0.49434100  | 0.12329400  | <b>3<sub>eq</sub></b> |             |             |             |
| H        | 3.46634500  | 1.21904400  | -0.91143900 | O                     | 4.36745500  | 0.00032200  | 0.45503600  |
| H        | 3.31613700  | 1.33768400  | 0.85511800  | C                     | 3.77663900  | -1.17058900 | -0.09722500 |
| H        | 3.01703800  | -0.99971400 | 0.79500500  | C                     | 2.27536900  | -1.18529500 | 0.15466300  |
| Br       | 0.32845200  | -0.18582900 | -0.04953800 | O                     | 1.68066100  | -0.00027300 | -0.39821100 |
| Br       | -2.02975900 | 0.12682600  | 0.02749200  | C                     | 2.27489100  | 1.18505000  | 0.15458400  |
| <b>2</b> |             |             |             | C                     | 3.77615400  | 1.17095200  | -0.09731100 |
| O        | -2.63142600 | 0.00002300  | -0.33683900 | H                     | 3.97076400  | -1.21812600 | -1.17882900 |
| C        | -3.19760300 | -1.18575100 | 0.20817300  | H                     | 4.25546400  | -2.02476100 | 0.38543300  |
| H        | -4.27293800 | -1.22657000 | -0.00391900 | H                     | 2.07051700  | -1.22911200 | 1.23196400  |
| H        | -2.70167300 | -2.02751000 | -0.27269700 | H                     | 1.79424200  | -2.03104300 | -0.33814400 |
| H        | -3.04110700 | -1.24091500 | 1.29258400  | H                     | 2.07003000  | 1.22883500  | 1.23189000  |
| C        | -3.19668900 | 1.18639100  | 0.20793100  | H                     | 1.79333400  | 2.03052000  | -0.33827400 |
| H        | -4.27189100 | 1.22819300  | -0.00465200 | H                     | 3.97026500  | 1.21849900  | -1.17891900 |
| H        | -3.04062800 | 1.24139000  | 1.29240500  | H                     | 4.25463000  | 2.02534400  | 0.38529300  |

|                       |             |             |             |                       |             |             |             |
|-----------------------|-------------|-------------|-------------|-----------------------|-------------|-------------|-------------|
| Br                    | -0.89056100 | -0.00009000 | -0.15136500 | C                     | 4.36764600  | -0.13387000 | 0.42592700  |
| Br                    | -3.25751000 | 0.00005400  | 0.11298600  | H                     | 4.28205700  | -0.19034400 | 1.52211800  |
|                       |             |             |             | H                     | 5.41491900  | -0.26540900 | 0.15491900  |
| <b>3<sub>ax</sub></b> |             |             |             | O                     | 3.66078200  | -1.22945400 | -0.16356600 |
| O                     | -3.74752400 | 0.00183600  | 1.01960300  |                       |             |             |             |
| C                     | -2.98557700 | -1.17149000 | 0.75242000  | <b>4<sub>ax</sub></b> |             |             |             |
| C                     | -2.52337800 | -1.18839300 | -0.69718000 | C                     | -2.56677300 | -1.29348000 | -0.34676700 |
| O                     | -1.77611900 | -0.00152300 | -1.00309000 | O                     | -1.80498200 | -0.28584700 | -0.99953100 |
| C                     | -2.52250800 | 1.18666300  | -0.70020600 | C                     | -2.49124300 | 0.97886500  | -0.99204300 |
| C                     | -2.98454000 | 1.17382200  | 0.74947500  | C                     | -2.85909700 | 1.37798700  | 0.43598500  |
| H                     | -2.11422800 | -1.21790200 | 1.42157000  | H                     | -3.50396400 | -1.43330100 | -0.91276200 |
| H                     | -3.63549000 | -2.02367300 | 0.96046700  | H                     | -1.96601100 | -2.19976500 | -0.36168200 |
| H                     | -3.38955100 | -1.23971300 | -1.36986900 | H                     | -3.39153900 | 0.88458900  | -1.61582400 |
| H                     | -1.86116900 | -2.03093700 | -0.90130600 | H                     | -1.81726900 | 1.69253400  | -1.46436200 |
| H                     | -3.38875400 | 1.23683000  | -1.37288900 | H                     | -1.94697300 | 1.59689700  | 0.99718700  |
| H                     | -1.85974100 | 2.02820600  | -0.90664200 | H                     | -3.48004000 | 2.27946800  | 0.42798300  |
| H                     | -2.11307000 | 1.22104200  | 1.41841200  | Br                    | 0.71923800  | -0.10574300 | -0.30529400 |
| H                     | -3.63363500 | 2.02711700  | 0.95550000  | Br                    | 3.01536200  | 0.08300900  | 0.27726600  |
| Br                    | 0.73907800  | -0.00065000 | -0.31411800 | C                     | -3.60107300 | 0.21946300  | 1.10328300  |
| Br                    | 3.04037400  | 0.00044700  | 0.28656300  | H                     | -4.58851900 | 0.07516600  | 0.63750400  |
| <b>4<sub>eq</sub></b> |             |             |             | H                     | -3.74553700 | 0.38643700  | 2.17033400  |
| C                     | 2.29299400  | -1.15849500 | 0.10515100  | O                     | -2.84027100 | -0.98707200 | 0.98701200  |
| O                     | 1.70428100  | 0.02155600  | -0.43582900 | <b>5</b>              |             |             |             |
| C                     | 2.28969600  | 1.20580500  | 0.13316700  | C                     | -3.14364400 | 0.03276200  | -0.00380500 |
| C                     | 3.80165200  | 1.18963300  | -0.08785900 | O                     | -2.22918000 | -0.77072500 | -0.00087600 |
| H                     | 2.10893700  | -1.18260700 | 1.19261200  | C                     | -4.57797700 | -0.44725200 | 0.00734400  |
| H                     | 1.81370300  | -1.99970100 | -0.38971300 | C                     | -2.91775000 | 1.52636400  | -0.00627800 |
| H                     | 2.05183000  | 1.24460300  | 1.20568200  | H                     | -4.61149200 | -1.52179900 | 0.17844200  |
| H                     | 1.80709100  | 2.04909700  | -0.35941900 | H                     | -5.15646700 | 0.07805300  | 0.77262300  |
| H                     | 4.01179800  | 1.28125000  | -1.15667200 | H                     | -5.04179700 | -0.21862800 | -0.95808900 |
| H                     | 4.26633600  | 2.03615000  | 0.42769600  | H                     | -3.63182000 | 2.03178900  | -0.66086600 |
| Br                    | -0.89474400 | -0.00023300 | -0.16928600 | H                     | -3.08673200 | 1.90520600  | 1.00802800  |
| Br                    | -3.25351600 | 0.00228200  | 0.13327600  | H                     | -1.89685600 | 1.76310200  | -0.30073200 |

|          |            |             |             |    |             |             |            |
|----------|------------|-------------|-------------|----|-------------|-------------|------------|
| Br       | 0.32874100 | -0.27221900 | -0.00200300 | O  | 1.07874300  | 2.88238900  | 0.00000000 |
| Br       | 2.67396900 | 0.14241400  | 0.00154700  | Br | 0.00000000  | 0.45221700  | 0.00000000 |
|          |            |             |             | Br | -0.80154700 | -1.77961200 | 0.00000000 |
| <b>6</b> |            |             |             | H  | 2.89972000  | 2.00241100  | 0.00000000 |
| C        | 2.28352800 | 2.91901400  | 0.00000000  | H  | 2.82331500  | 3.88320900  | 0.00000000 |

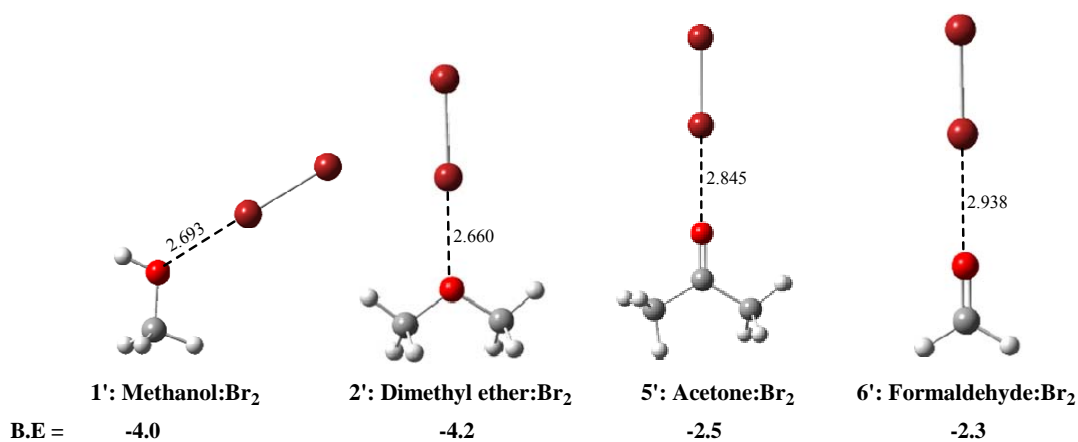

**Fig. S1** MP2/6-311+G\* optimized geometries of  $\sigma$ -type interaction for methanol, dimethyl ether, acetone and formaldehyde with bromine molecule. [Distances are in Å] [BSSE corrected binding energies given in kcal/mol] [Gray = carbon; white = hydrogen; red = oxygen; dark red = bromine]

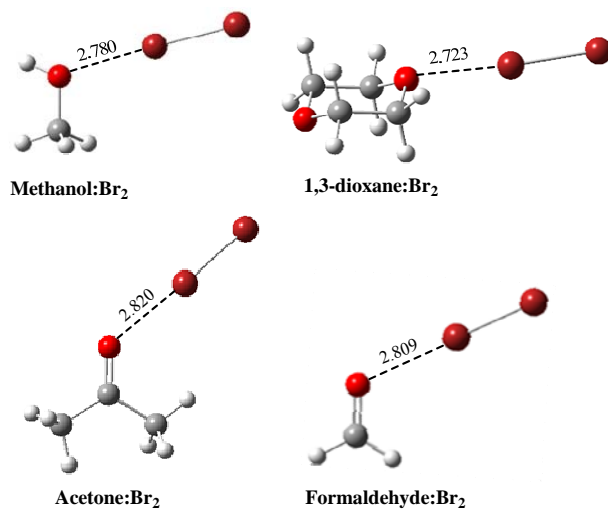

**Fig. S2** Different geometries of methanol, 1,3-dioxane, acetone and formaldehyde with bromine molecule taken from x-ray crystal structure. [Distances are in Å] [Gray = carbon; white = hydrogen; red = oxygen; dark red = bromine]

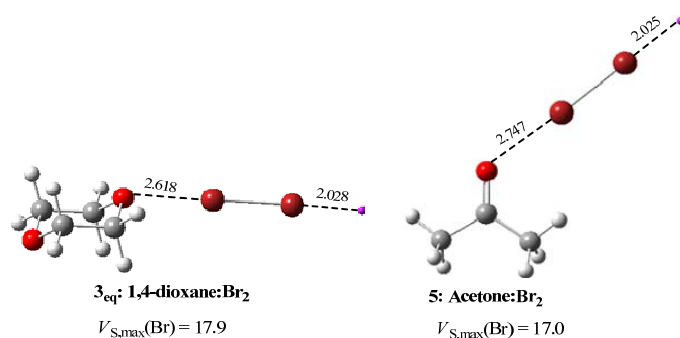

**Fig. S3** The maximum electrostatic potentials ( $V_{S,max}$ , kcal/mol) of bromine atom for 1,4-dioxane:Br<sub>2</sub> and acetone:Br<sub>2</sub> complexes. The distances are given in Å. [Gray = carbon; white = hydrogen; red = oxygen; dark red = bromine]

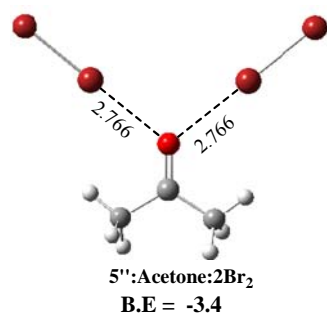

**Fig. S4** MP2/6-311+G\* optimized bridging geometry of acetone with bromine molecule. [Distances are in Å] [Binding energies (BSSE corrected) are in kcal/mol] [Gray = carbon; white = hydrogen; red = oxygen; dark red = bromine]

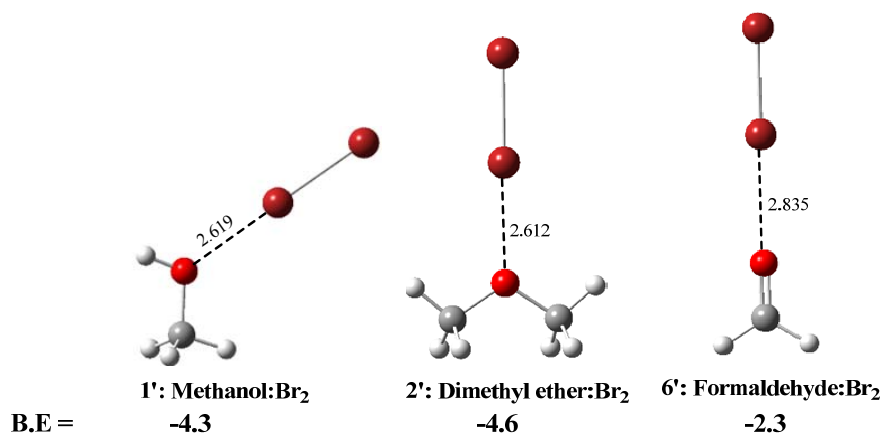

**Fig. S5** CBS-QB3 optimized geometries of  $\sigma$ -type interaction for methanol, dimethyl ether and formaldehyde with bromine molecule. [Distances are in Å] [Binding energies are in kcal/mol] [Gray = carbon; white = hydrogen; red = oxygen; dark red = bromine]
